# Supplementary material for: Trivariate Joint Distribution Modelling of Compound Events Using the Nonparametric D-Vine Copula Developed Based on a Bernstein and Beta Kernel Copula Density Framework
Source: MDPI journal article supplement (doi:10.3390/hydrology9120221), 2022-12-07
Supplement: s1 [file s1]

SUPPLEMENTARY (FIGURES AND TABLES)

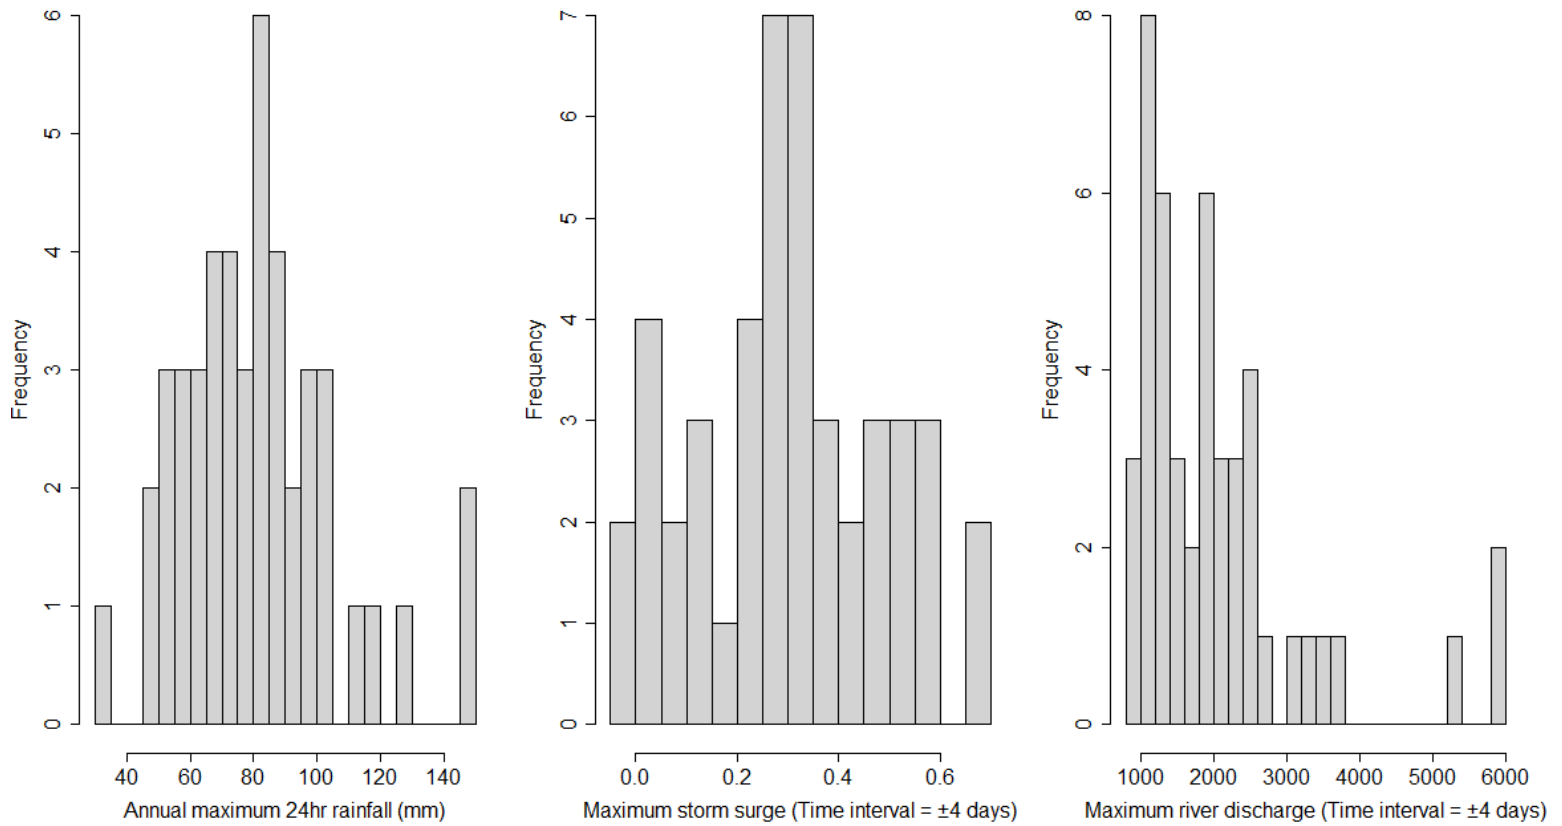

Figure S1: Histogram plot of selected compound flood (CF) drivers

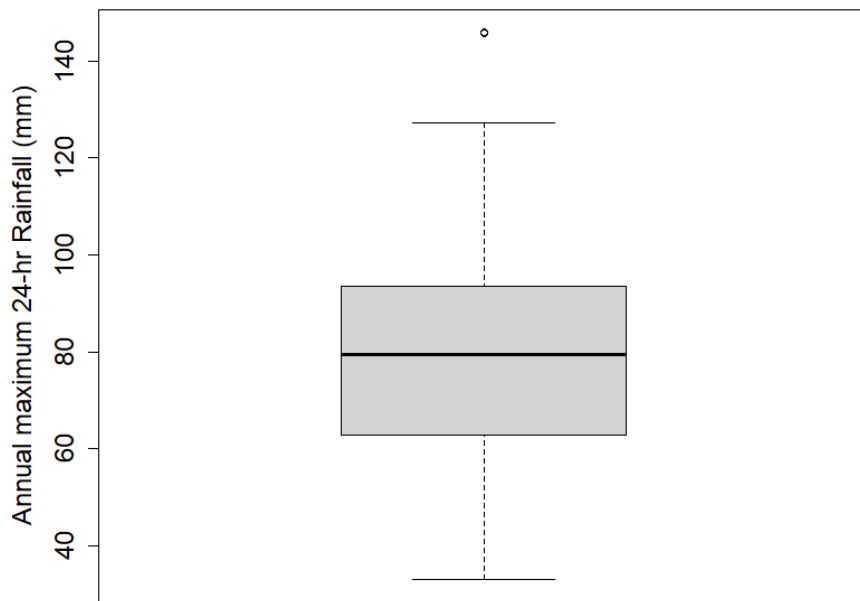

(a)

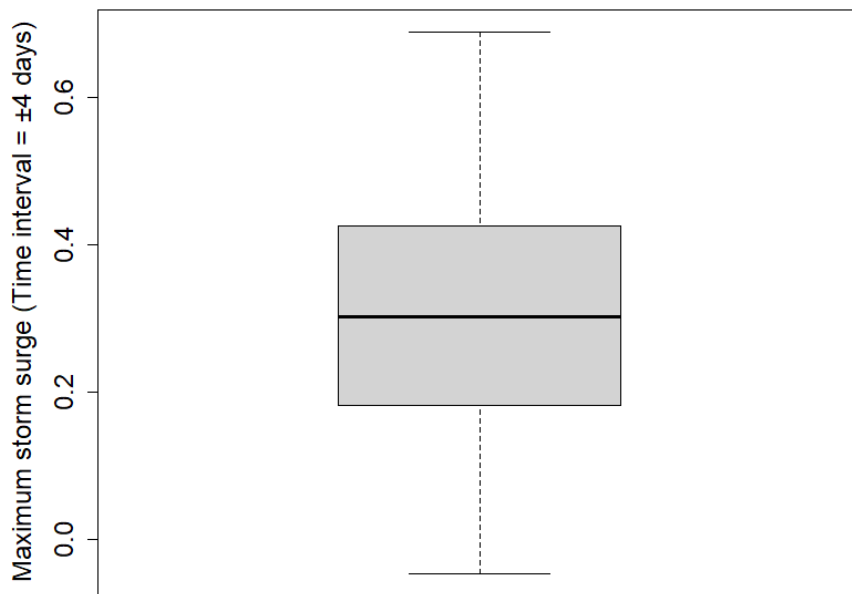

(b)

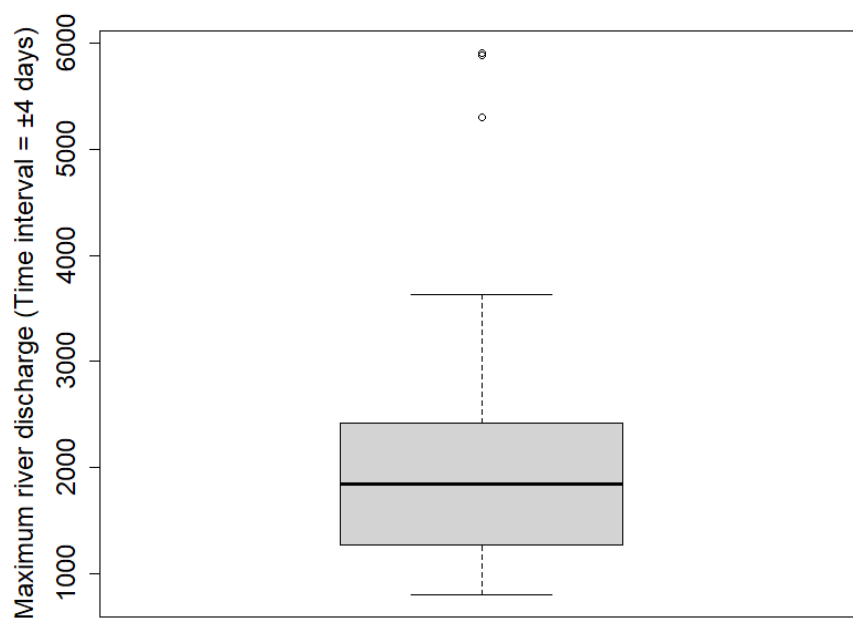

(c)

Figure S2: Box whisker plot of CF drivers (a) Annual maximum 24-hr Rainfall (mm) (b) Maximum Storm surge (Time interval =  $\pm 4$  days) (m) (c) Maximum River discharge (Time interval =  $\pm 4$  days) ( $\text{m}^3\text{sec}^{-1}$ )

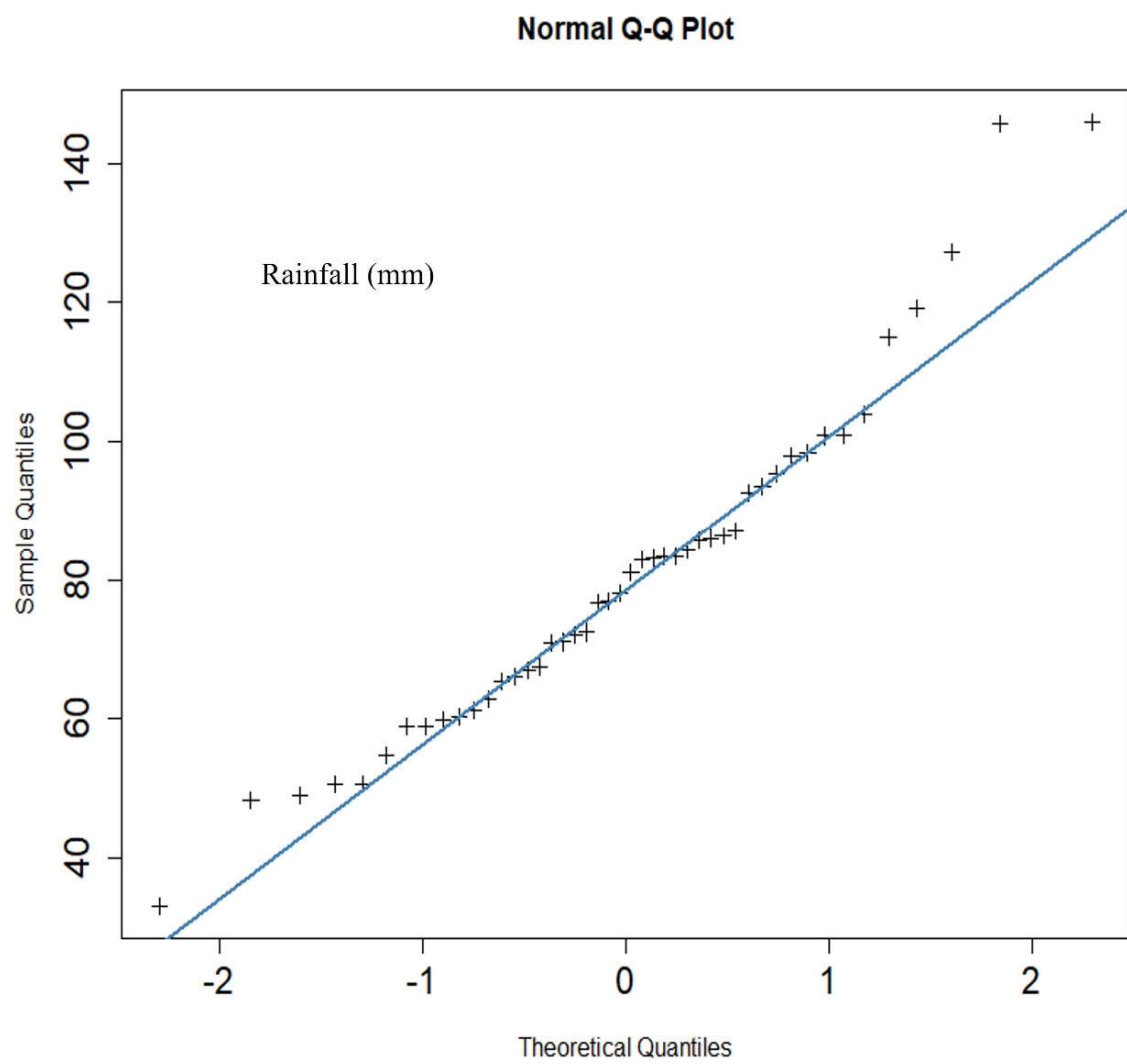

(a)

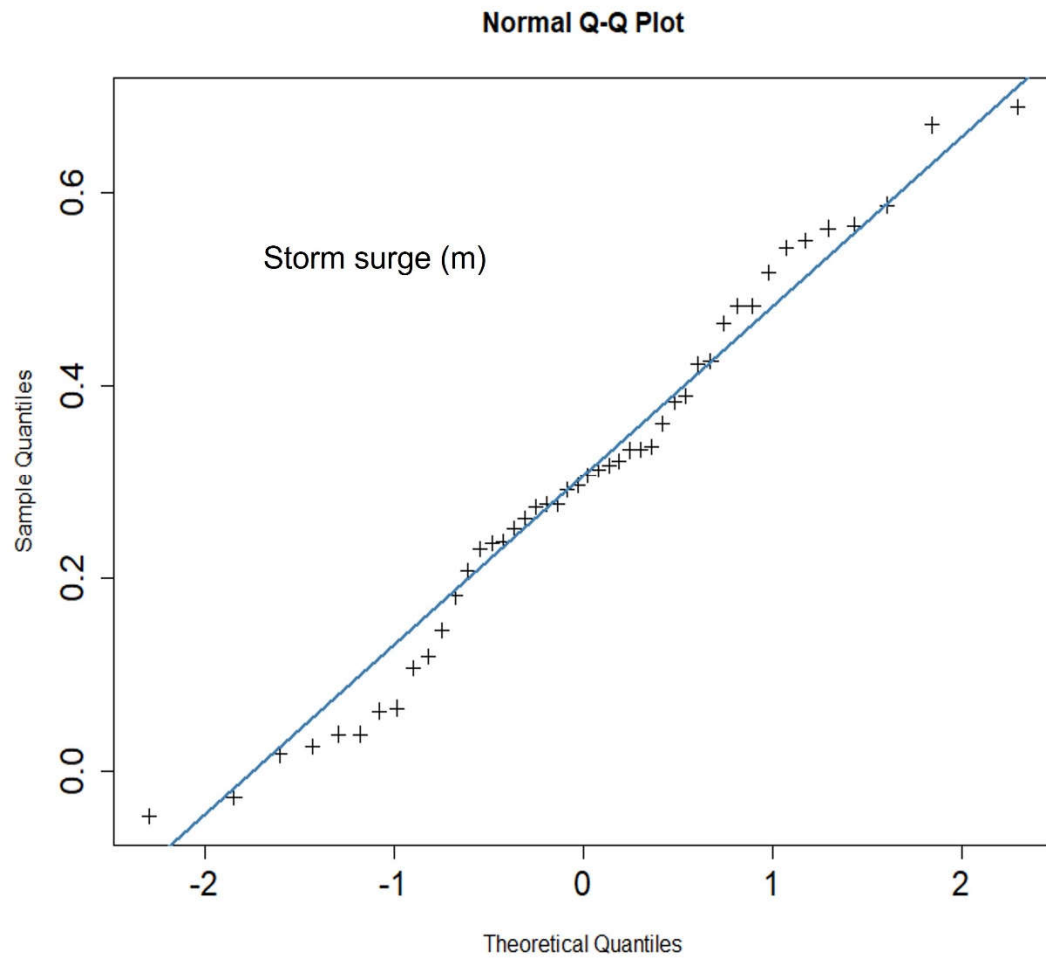

(b)

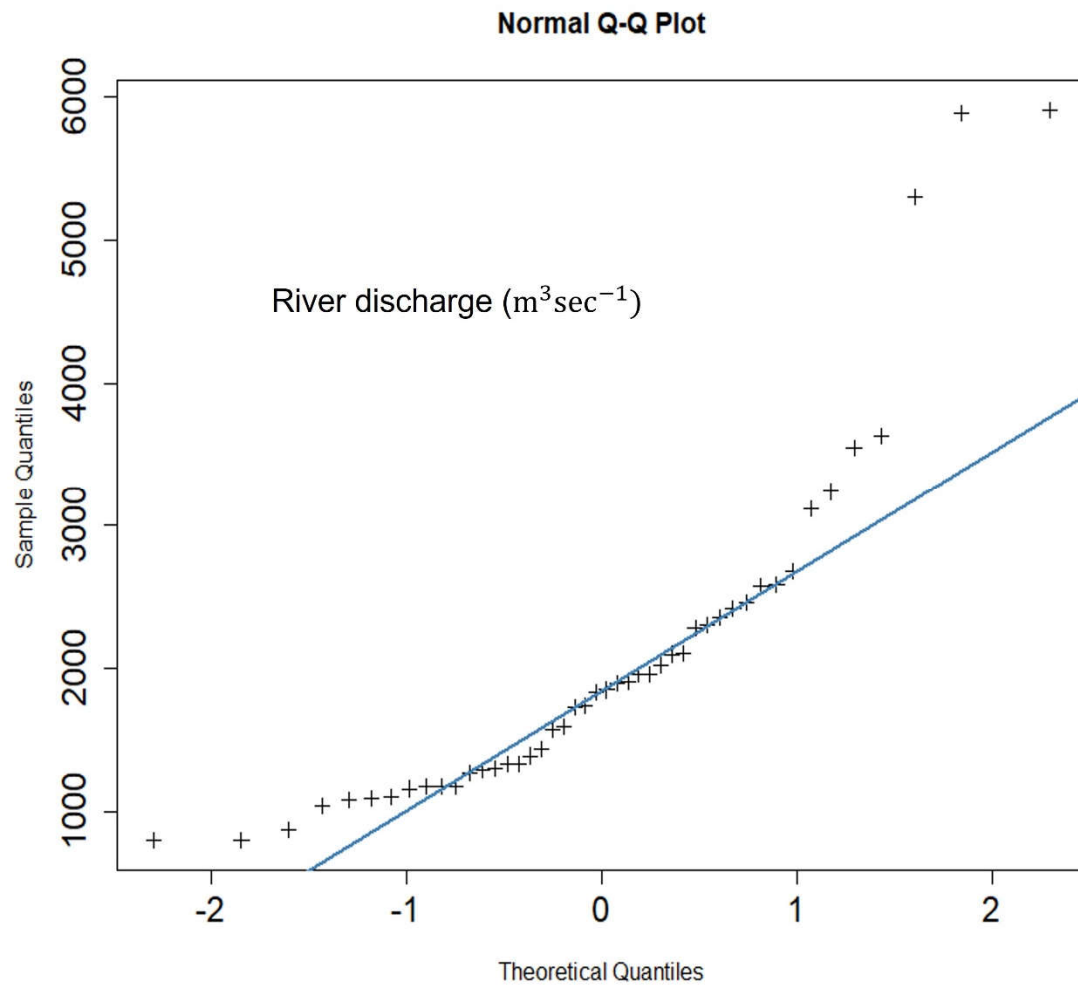

(c)

Figure S3: Normal Quantile-Quantile (Q-Q) plots for (a) Annual maximum 24-hr Rainfall (mm) (b) Maximum Storm surge (Time interval =  $\pm 4$  days) (m) (c) Maximum River discharge (Time interval =  $\pm 4$  days) ( $\text{m}^3\text{sec}^{-1}$ )

Table S1: Basic summary statistics of the selected compound flooding (CF) drivers

| Annual Maximum 24-hr Rainfall (mm) | Maximum Storm surge (Time interval = $\pm 4$ days) (m) | Maximum River discharge (Time interval = $\pm 4$ days) ( $m^3 sec^{-1}$ ) |
|------------------------------------|--------------------------------------------------------|---------------------------------------------------------------------------|
| Min. : 33.00                       | Min. : -0.0470                                         | Min. : 800                                                                |
| 1st Qu.: 63.42                     | 1st Qu.: 0.1875                                        | 1st Qu.: 1275                                                             |
| Median : 79.50                     | Median : 0.3015                                        | Median : 1840                                                             |
| Mean : 80.68                       | Mean : 0.3025                                          | Mean : 2074                                                               |
| 3rd Qu.: 93.35                     | 3rd Qu.: 0.4243                                        | 3rd Qu.: 2405                                                             |
| Max. : 146.00                      | Max. : 0.6890                                          | Max. : 5910                                                               |
| Var: 589.0201                      | Var: 0.03544252                                        | Var: 1438211                                                              |

Table S2: Test for homogeneity within individual time series of CF drivers

| Flood variables                                                                                                                                                                                                                                                         | Pettitt (Estimated p-value)                                | SNHT test (Estimated p-value)                              | Buishand (Estimated p-value)                               | Overall conclusion                   |
|-------------------------------------------------------------------------------------------------------------------------------------------------------------------------------------------------------------------------------------------------------------------------|------------------------------------------------------------|------------------------------------------------------------|------------------------------------------------------------|--------------------------------------|
| Annual Maximum 24-hr Rainfall (mm)                                                                                                                                                                                                                                      | $1 > 0.05$ (significance level)                            | $0.7764 > 0.05$ (significance level)                       | $0.8316 > 0.05$ (significance level)                       | Time series is homogenous            |
| <b>Storm Surge (Time interval = <math>\pm 4</math> days) (m)*</b>                                                                                                                                                                                                       | <b><math>0.02541 &lt; 0.05</math> (significance level)</b> | <b><math>0.02755 &lt; 0.05</math> (significance level)</b> | <b><math>0.09325 &gt; 0.05</math> (significance level)</b> | <b>Time series is not homogenous</b> |
| River Discharge (Time interval = $\pm 4$ days) ( $m^3 sec^{-1}$ )                                                                                                                                                                                                       | $0.5625 > 0.05$ (significance level)                       | $0.8773 > 0.05$ (significance level)                       | $0.5616 > 0.05$ (significance level)                       | Time series is homogenous            |
| <p>Note: The p-value has been computed using 20000 Monte Carlo simulations.</p> <p>*Storm surge events (bold letter with an asterisk) exhibited non-homogenous behaviour, their estimated p-value for the Pettitt and SNHT tests is less than <math>p = 0.05</math></p> |                                                            |                                                            |                                                            |                                      |

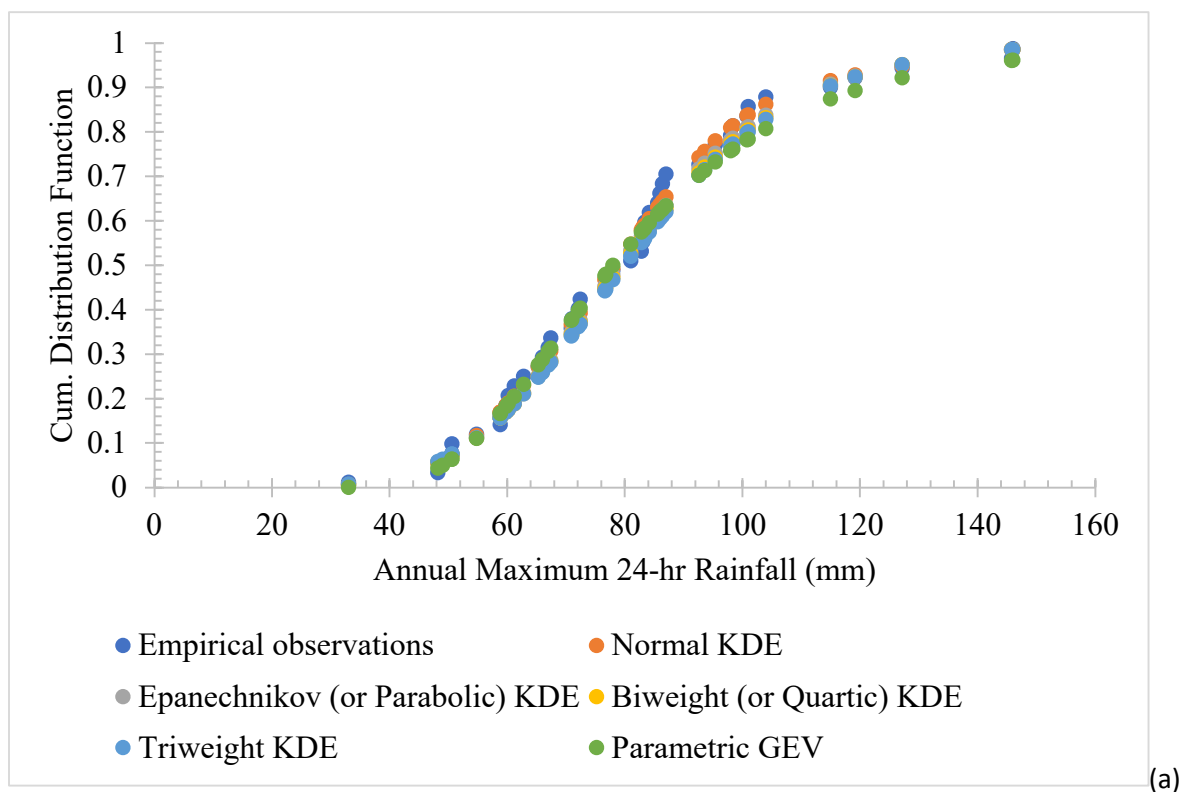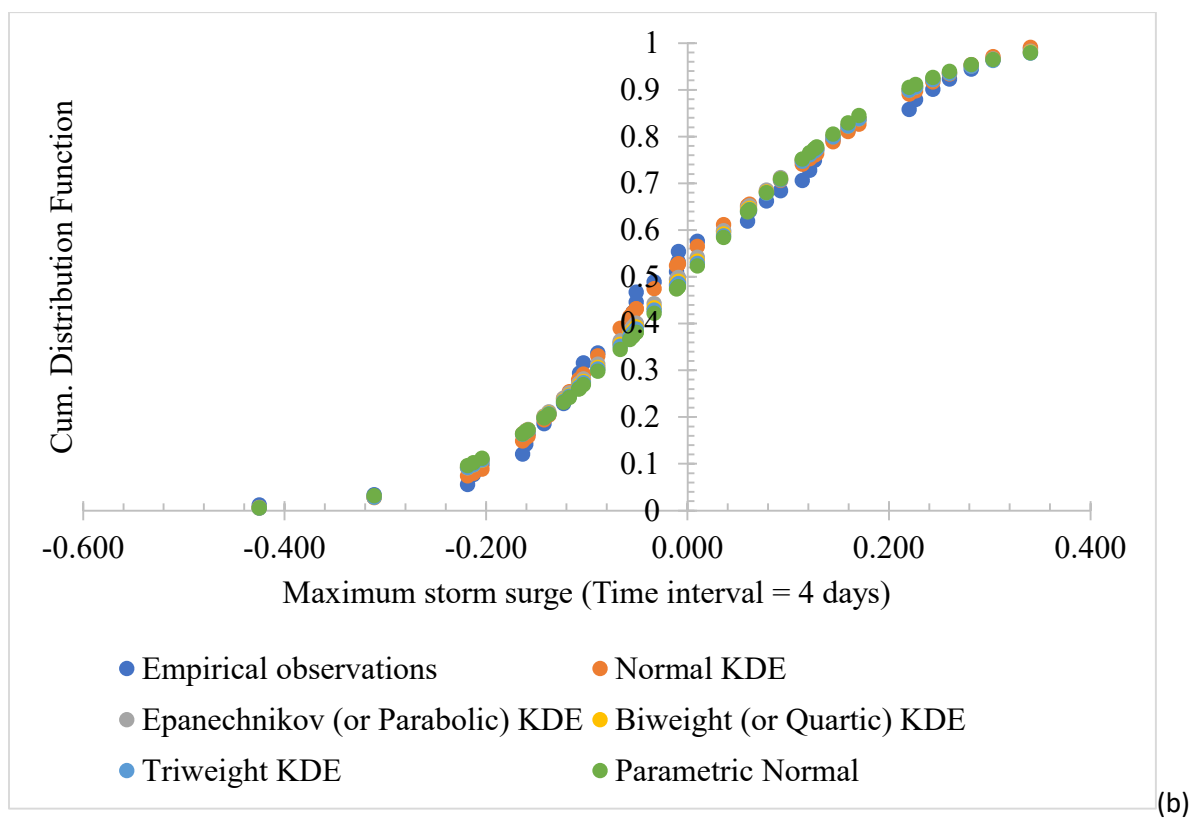



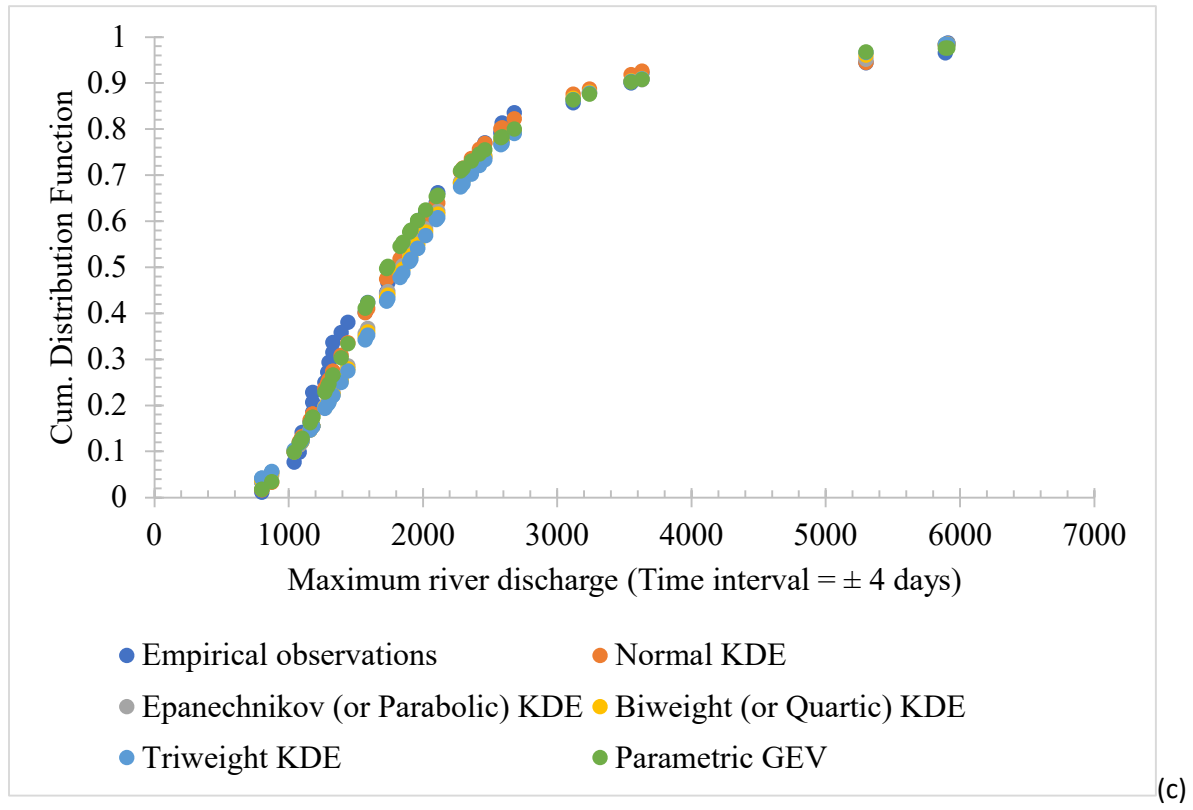

Figure S4: Qualitative based visual inspection of nonparametric model's performance fitted to (a) Annual maximum 24-hr Rainfall (mm) (b) Maximum Storm surge (Time interval =  $\pm 4$  days) (m) (c) Maximum River discharge (Time interval =  $\pm 4$  days) ( $\text{m}^3\text{sec}^{-1}$ )

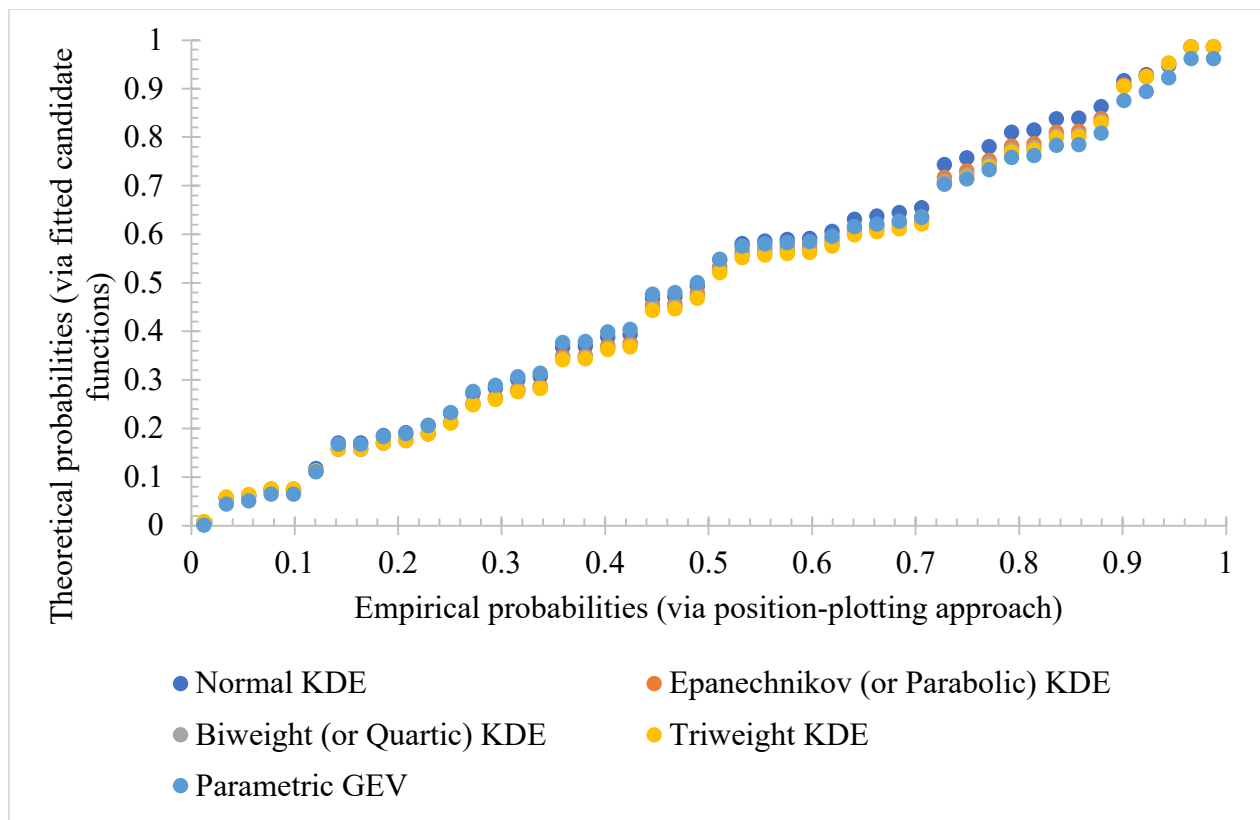

(a)

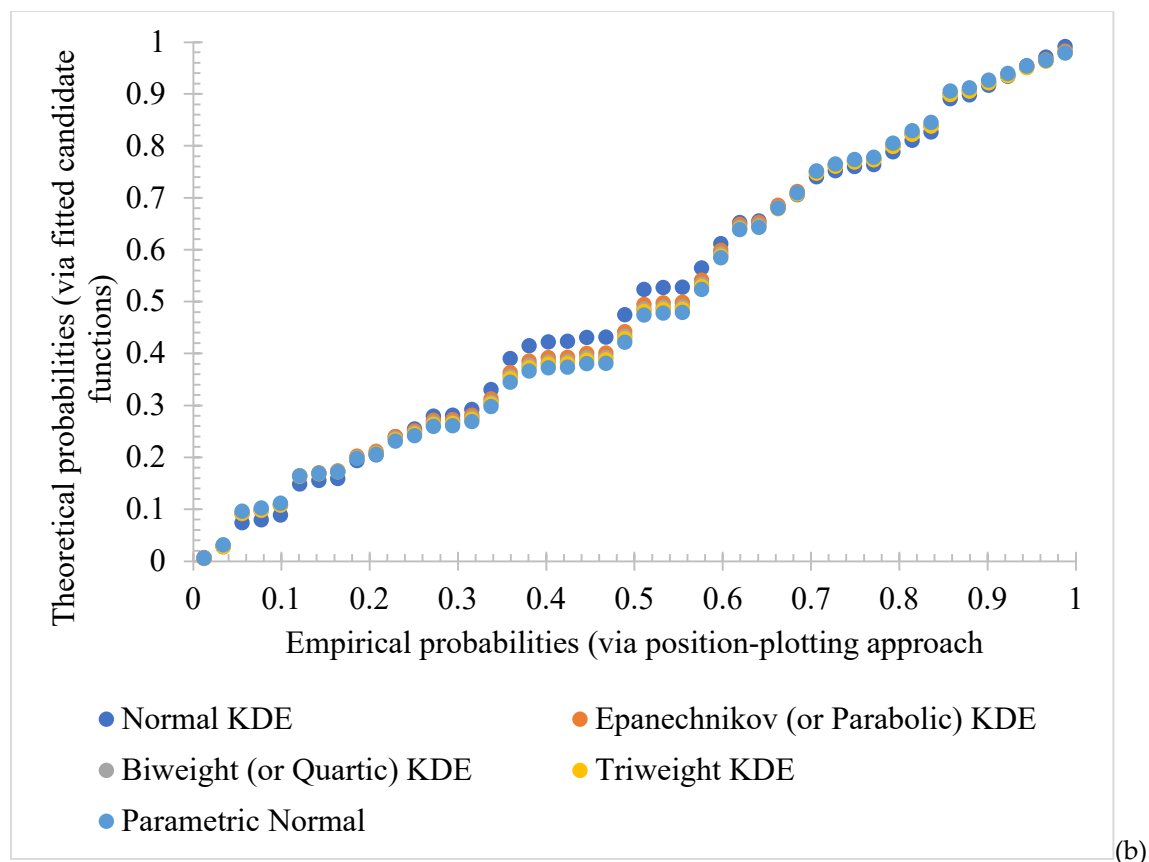

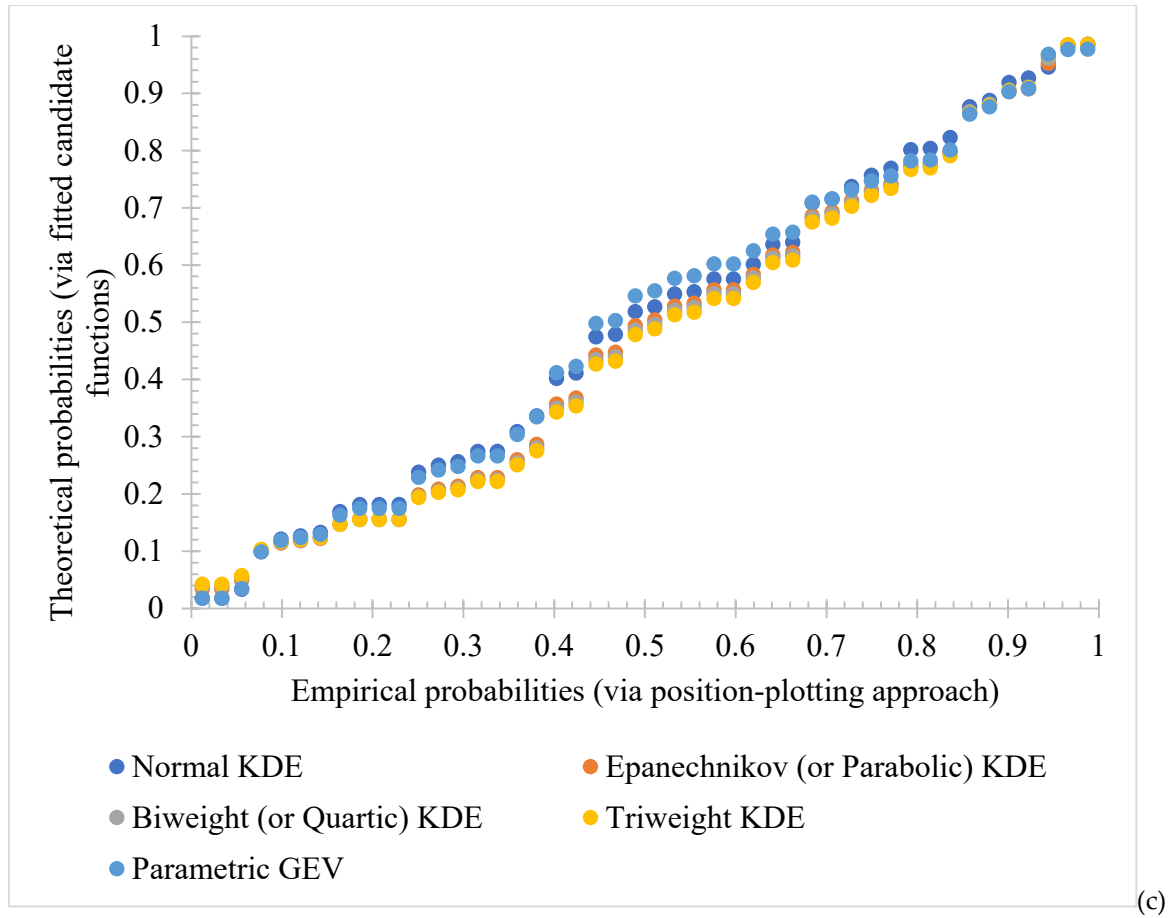

Figure S5: Comparing Probability-Probability (P-P) plots of the nonparametric models fitted to (a) Annual maximum 24-hr Rainfall (mm) (b) Maximum Storm surge (Time interval =  $\pm 4$  days) (m) (c) Maximum River discharge (Time interval =  $\pm 4$  days) ( $\text{m}^3\text{sec}^{-1}$ )

Table S3: Fitting 2-D parametric copulas in the second tree level (Tree 2) of vine structure constructed in parametric settings for (a) D-vine structure-1 (case-1) (b) D-vine structure-2 (case-2) (c) D-vine structure-3 (case-3)

| (a)           |                                                            |                          |                                | Cramer von Mises functional statistics with parametric bootstrap procedure (N = 1000 (No. of bootstrap samples)) |         |
|---------------|------------------------------------------------------------|--------------------------|--------------------------------|------------------------------------------------------------------------------------------------------------------|---------|
| Copula family | Parameter estimates ( $\theta_{12 3}$ ) via MPL estimators | Standard Error estimates | MLL (Maximized Log-likelihood) | $S_n$                                                                                                            | p-value |
| Clayton       | 0.4563                                                     | 0.226                    | 2.994                          | 0.045034                                                                                                         | 0.1004  |

|                         |                                                                  |              |              |                 |               |
|-------------------------|------------------------------------------------------------------|--------------|--------------|-----------------|---------------|
| Gumbel                  | 1.326                                                            | 0.137        | 3.885        | 0.0259          | 0.4241        |
| <b>Frank*</b>           | <b>2.925</b>                                                     | <b>0.886</b> | <b>4.651</b> | <b>0.018882</b> | <b>0.9096</b> |
| Joe                     | 1.387                                                            | 0.189        | 2.751        |                 |               |
| BB1<br>(Clayton-Gumbel) | $\theta = \text{theta} = 0.1784; \delta = \text{delta} = 1.2295$ | NA           | 4.165        | 0.039161        | 0.3651        |
| BB6 (Joe-Gumbel)        | $\theta = \text{theta} = 1; \delta = \text{delta} = 1.326$       | NA           | 3.885        | 0.041983        | 0.3312        |
| BB7 (Joe-Clayton)       | $\theta = \text{theta} = 1.2509; \delta = \text{delta} = 0.3332$ | NA           | 3.956        | 0.047131        | 0.2882        |
| BB8 (Joe-Frank)         | $\theta = \text{theta} = 6; \delta = \text{delta} = 0.41$        | NA           | 4.65         | 0.025064        | 0.6938        |
| Survival clayton        | 0.4985                                                           | NA           | 2.951        | 0.062309        | 0.1503        |
| Survival Joe            | 1.361                                                            | NA           | 2.082        | 0.080925        | 0.08242       |
| Survival Gumbel         | 1.301                                                            | NA           | 3.165        | 0.049017        | 0.2423        |
| Survival BB1            | $\theta = \text{theta} = 0.2346; \delta = \text{delta} = 1.1872$ | NA           | 3.523        | 0.041955        | 0.3242        |
| Survival BB6            | $\theta = \text{theta} = 1; \delta = \text{delta} = 1.301$       | NA           | 3.165        | 0.049017        | 0.2512        |
| Survival BB7            | $\theta = \text{theta} = 1.1831; \delta = \text{delta} = 0.3829$ | NA           | 3.226        | 0.050101        | 0.2313        |
| Survival BB8            | $\theta = \text{theta} = 6; \delta = \text{delta} = 0.42$        | NA           | 4.732        | 0.023331        | 0.7258        |

Note: Frank copula (bold letter with asterisk) fitted best in the dependence modelling of conditional flood pair (minimum value of  $S_n$  test statistics) in the second tree level (Tree 2) for D-vine structure-1 (case 1)

| (b)                       |                                                            |                          |                                | Cramer von Mises functional statistics with parametric bootstrap procedure (N = 1000 (No. of bootstrap samples)) |         |
|---------------------------|------------------------------------------------------------|--------------------------|--------------------------------|------------------------------------------------------------------------------------------------------------------|---------|
| Copula family             | Parameter estimates ( $\theta_{13 2}$ ) via MPL estimators | Standard Error estimates | MLL (Maximized Log-likelihood) | $S_n$                                                                                                            | p-value |
| Rotated Joe 90 degrees    | -1.033                                                     | NA                       | 0.03724                        | 0.019008                                                                                                         | 0.8646  |
| Rotated Gumbel 90 degrees | -1.023                                                     | NA                       | 0.03734                        | 0.019269                                                                                                         | 0.8586  |
| Frank                     | -0.3719                                                    | 0.858                    | 0.08094                        | 0.021318                                                                                                         | 0.9206  |
| Gaussian (or Normal)      | -0.04792                                                   | 0.149                    | 0.05882                        | 0.02055                                                                                                          | 0.9306  |
| Rotated BB1 90 degrees    | Theta = par = -3.438e-08<br>Delta = par2 = -1.023          | NA                       | 0.03732                        | 0.019269                                                                                                         | 0.8576  |
| Rotated BB6 90 degrees    | Theta = par = -1.02,<br>par2 = delta = -1.01               | NA                       | -6.883e-15                     | 0.019159                                                                                                         | 0.8606  |
| Rotated BB7 90 degrees    | Theta = par = -1.033;<br>delta = par2 = -6.135e-08         | NA                       | 0.03724                        | 0.019008                                                                                                         | 0.8506  |
| Rotated BB8 90 degrees    | Theta = par = -1.2042<br>Delta = par2 = -0.8715            | NA                       | 0.2371                         | 0.022101                                                                                                         | 0.7797  |
| Rotated BB1 270 degrees   | Theta = par = -0.08613                                     | NA                       | 0.2099                         | 0.020603                                                                                                         | 0.8397  |

|                                                                                                                                                                                                                                            |                                                         |    |                   |                 |               |
|--------------------------------------------------------------------------------------------------------------------------------------------------------------------------------------------------------------------------------------------|---------------------------------------------------------|----|-------------------|-----------------|---------------|
|                                                                                                                                                                                                                                            | Delta = par2 = -<br>1.00000                             |    |                   |                 |               |
| <b>Rotated BB6<br/>270 degrees*</b>                                                                                                                                                                                                        | <b>Theta = par = -1<br/>Delta = par2 = -1</b>           | NA | <b>-2.442e-15</b> | <b>0.018538</b> | <b>0.8696</b> |
| Rotated BB7<br>270 degrees                                                                                                                                                                                                                 | Theta = par = -<br>1.0000<br>Delta = par2 = -<br>0.0861 | NA | 0.2099            | 0.020602        | 0.8117        |
| Rotated BB8<br>270 degrees                                                                                                                                                                                                                 | Theta = par = -6<br>Delta = par2 = -0.07                | NA | 5.218e-15         | 0.020593        | 0.8167        |
| Note: Rotated BB6 270 degrees copula (bold letter with an asterisk) fitted best in the joint modelling of conditional flood pair (minimum value of $S_n$ test statistics) in second tree level (Tree-2) of the D-vine structure-2 (case-2) |                                                         |    |                   |                 |               |

|                      |                                                                     |                          |                                |                                                                                                                  |               |
|----------------------|---------------------------------------------------------------------|--------------------------|--------------------------------|------------------------------------------------------------------------------------------------------------------|---------------|
| (c)                  |                                                                     |                          |                                | Cramer von Mises functional statistics with parametric bootstrap procedure (N = 1000 (No. of bootstrap samples)) |               |
| Copula family        | Parameter estimates ( $\theta_{23 1}$ ) via MPL estimators          | Standard Error estimates | MLL (Maximized Log-likelihood) | $S_n$                                                                                                            | p-value       |
| Clayton              | 0.6626                                                              | 0.263                    | 4.831                          | 0.054285                                                                                                         | 0.05844       |
| Gumbel               | 1.301                                                               | 0.119                    | 3.387                          | 0.027878                                                                                                         | 0.2892        |
| <b>Frank*</b>        | <b>2.972</b>                                                        | <b>0.946</b>             | <b>5.483</b>                   | <b>0.019514</b>                                                                                                  | <b>0.8776</b> |
| Joe                  | 1.324                                                               | 0.147                    | 1.882                          | 0.052833                                                                                                         | 0.04046       |
| BB1 (Clayton-Gumbel) | $\theta = \text{theta} = 0.5498$ ; $\delta = \text{delta} = 1.0660$ | NA                       | 4.901                          | 0.053774                                                                                                         | 0.1863        |

|                   |                                                                                   |    |       |          |         |
|-------------------|-----------------------------------------------------------------------------------|----|-------|----------|---------|
| BB6 (Joe-Gumbel)  | $\theta = \text{theta} = 1;$<br>$\delta = \text{delta} = 1.301$                   | NA | 3.387 | 0.060648 | 0.1643  |
| BB7 (Joe-Clayton) | $\theta = \text{theta} = 1.0000;$ $\delta = \text{delta} = 0.6626$                | NA | 4.831 | 0.063413 | 0.1214  |
| BB8 (Joe-Frank)   | $\theta = \text{theta} = 6;$<br>$\delta = \text{delta} = 0.41$                    | NA | 5.483 | 0.033341 | 0.492   |
| Survival clayton  | 0.4335                                                                            | NA | 2.747 | 0.08952  | 0.05544 |
| Survival Joe      | 1.531                                                                             | NA | 4.078 | 0.073942 | 0.09241 |
| Survival Gumbel   | 1.374                                                                             | NA | 4.879 | 0.048689 | 0.2343  |
| Survival BB1      | $\theta = \text{theta} = 2.813\text{e} - 08 ;$<br>$\delta = \text{delta} = 1.374$ | NA | 4.879 | 0.048689 | 0.2363  |
| Survival BB6      | $\theta = \text{theta} = 1;$ $\delta = \text{delta} = 1.374$                      | NA | 4.879 | 0.048689 | 0.2363  |
| Survival BB7      | $\theta = \text{theta} = 1.4184;$ $\delta = \text{delta} = 0.2054$                | NA | 4.415 | 0.057852 | 0.1863  |
| Survival BB8      | $\theta = \text{theta} = 5.77;$ $\delta = \text{delta} = 0.44$                    | NA | 5.557 | 0.032239 | 0.499   |



Note: Frank copula (bold letter with an asterisk) fitted best in the joint modelling of conditional flood pair (minimum value of  $S_n$  test statistics) in second tree level (Tree-2) of the D-vine structure-3 (case-3)

Table S4: Fitting 2-D parametric copulas in the second tree level (Tree 2) of vine structure constructed in semiparametric settings (parametric copula with nonparametric marginal pdfs) for (a) D-vine structure-1 (case-1) (b) D-vine structure-2 (case-2) (c) D-vine structure-3 (case-3)

| (a)                  |                                                                  |                          |                                | Cramer von Mises functional statistics with parametric bootstrap procedure (N = 1000 (No. of bootstrap samples)) |               |
|----------------------|------------------------------------------------------------------|--------------------------|--------------------------------|------------------------------------------------------------------------------------------------------------------|---------------|
| Copula family        | Parameter estimates ( $\theta_{12 3}$ ) via MPL estimators       | Standard Error estimates | MLL (Maximized Log-likelihood) | $S_n$                                                                                                            | p-value       |
| Clayton              | 0.4604                                                           | 0.239                    | 3.03                           | 0.036116                                                                                                         | 0.1983        |
| Gumbel               | 1.341                                                            | 0.166                    | 4.417                          | 0.019725                                                                                                         | 0.7637        |
| <b>Frank*</b>        | <b>2.898</b>                                                     | <b>0.889</b>             | <b>4.743</b>                   | <b>0.015242</b>                                                                                                  | <b>0.9865</b> |
| Joe                  | 1.425                                                            | 0.239                    | 3.375                          | 0.039103                                                                                                         | 0.1404        |
| BB1 (Clayton-Gumbel) | $\theta = \text{theta} = 0.1479; \delta = \text{delta} = 1.2585$ | NA                       | 4.595                          | 0.029008                                                                                                         | 0.5659        |
| BB6 (Joe-Gumbel)     | $\theta = \text{theta} = 1; \delta = \text{delta} = 1.341$       | NA                       | 4.417                          | 0.031311                                                                                                         | 0.538         |
| BB7 (Joe-Clayton)    | $\theta = \text{theta} = 1.2868; \delta = \text{delta} = 0.3207$ | NA                       | 4.415                          | 0.035376                                                                                                         | 0.4481        |
| BB8 (Joe-Frank)      | $\theta = \text{theta} = 6; \delta = \text{delta} = 0.41$        | NA                       | 4.743                          | 0.019621                                                                                                         | 0.8317        |

|                                                                                                                                                                                                                                                                                                              |                                                                  |    |       |          |        |
|--------------------------------------------------------------------------------------------------------------------------------------------------------------------------------------------------------------------------------------------------------------------------------------------------------------|------------------------------------------------------------------|----|-------|----------|--------|
| Survival clayton                                                                                                                                                                                                                                                                                             | 0.5437                                                           | NA | 3.515 | 0.047034 | 0.2443 |
| Survival Joe                                                                                                                                                                                                                                                                                                 | 1.351                                                            | NA | 2.049 | 0.070968 | 0.1164 |
| Survival Gumbel                                                                                                                                                                                                                                                                                              | 1.301                                                            | NA | 3.255 | 0.039981 | 0.4011 |
| Survival BB1                                                                                                                                                                                                                                                                                                 | $\theta = \text{theta} = 0.3195; \delta = \text{delta} = 1.1509$ | NA | 3.904 | 0.032153 | 0.504  |
| Survival BB6                                                                                                                                                                                                                                                                                                 | $\theta = \text{theta} = 1; \delta = \text{delta} = 1.301$       | NA | 3.255 | 0.039981 | 0.3711 |
| Survival BB7                                                                                                                                                                                                                                                                                                 | $\theta = \text{theta} = 1.1397; \delta = \text{delta} = 0.4565$ | NA | 3.681 | 0.038429 | 0.3721 |
| Survival BB8                                                                                                                                                                                                                                                                                                 | $\theta = \text{theta} = 6; \delta = \text{delta} = 0.41$        | NA | 4.773 | 0.019717 | 0.8367 |
| Note: Frank copula (bold letter with an asterisk) exhibited minimum value Cramer-Von Mises functional $S_n$ statistics with p-value is greater than 0.05, thus recognized as the most parsimonious bivariate copula in defining bivariate joint dependence structure in Tree 2 for D-vine structure (case-1) |                                                                  |    |       |          |        |

|                        |                                                            |                          |                                |                                                                                                                  |         |
|------------------------|------------------------------------------------------------|--------------------------|--------------------------------|------------------------------------------------------------------------------------------------------------------|---------|
| (b)                    |                                                            |                          |                                | Cramer von Mises functional statistics with parametric bootstrap procedure (N = 1000 (No. of bootstrap samples)) |         |
| Copula family          | Parameter estimates ( $\theta_{13 2}$ ) via MPL estimators | Standard Error estimates | MLL (Maximized Log-likelihood) | $S_n$                                                                                                            | p-value |
| Rotated Joe 90 degrees | -1.03                                                      | NA                       | 0.03642                        | 0.018955                                                                                                         | 0.8736  |

|                                 |                                                       |           |                   |                 |               |
|---------------------------------|-------------------------------------------------------|-----------|-------------------|-----------------|---------------|
| Rotated Gumbel 90 degrees       | -1.019                                                | NA        | 0.03016           | 0.019115        | 0.8746        |
| Frank                           | -0.2357                                               | 0.859     | 0.03313           | 0.021389        | 0.9066        |
| Gaussian (or Normal)            | -0.0437                                               | 0.15      | 0.04946           | 0.022396        | 0.8696        |
| Rotated BB1 90 degrees          | Theta = par = -5.383e-08<br>Delta = par2 = -1.019e+00 | NA        | 0.03016           | 0.019115        | 0.8546        |
| Rotated BB6 90 degrees          | Theta = par = -1.03, par2 = delta = -1                | NA        | -4.441e-15        | 0.018955        | 0.8606        |
| Rotated BB7 90 degrees          | Theta = par = -1.030e+00; delta = par2 = -4.136e-09   | NA        | 0.03641           | 0.018955        | 0.8516        |
| Rotated BB8 90 degrees          | Theta = par = -1.1328<br>Delta = par2 = -0.8967       | NA        | 0.1476            | 0.021387        | 0.7817        |
| Rotated BB1 270 degrees         | Theta = par = --0.081<br>Delta = par2 = -1.00000      | NA        | 0.195             | 0.021287        | 0.7847        |
| <b>Rotated BB6 270 degrees*</b> | <b>Theta = par = -1</b><br><b>Delta = par2 = -1</b>   | <b>NA</b> | <b>-6.661e-16</b> | <b>0.017848</b> | <b>0.8866</b> |
| Rotated BB7 270 degrees         | Theta = par = -1.0000<br>Delta = par2 = -0.08104      | NA        | 0.195             | 0.021289        | 0.7977        |

|                                                                                                                                                                                                                                                                                                                                             |                                              |    |           |         |        |
|---------------------------------------------------------------------------------------------------------------------------------------------------------------------------------------------------------------------------------------------------------------------------------------------------------------------------------------------|----------------------------------------------|----|-----------|---------|--------|
| Rotated<br>BB8 270<br>degrees                                                                                                                                                                                                                                                                                                               | Theta = par = -6<br>Delta = par2 = -<br>0.04 | NA | 8.993e-15 | 0.01939 | 0.8467 |
| Note: Rotated BB6 270 degrees (or r270BB6 Copula) (bold letter with asterisk) exhibited minimum value Cramer-Von Mises functional $S_n$ statistics with p-value is greater than 0.05, thus recognized as the most parsimonious bivariate copula in defining bivariate joint dependence structure in Tree 2 for D-vine structure-2 (case 2). |                                              |    |           |         |        |

| (c)                  |                                                                     |                          |                                | Cramer von Mises functional statistics with parametric bootstrap procedure (N = 1000 (No. of bootstrap samples)) |               |
|----------------------|---------------------------------------------------------------------|--------------------------|--------------------------------|------------------------------------------------------------------------------------------------------------------|---------------|
| Copula family        | Parameter estimates ( $\theta_{23 1}$ ) via MPL estimators          | Standard Error estimates | MLL (Maximized Log-likelihood) | $S_n$                                                                                                            | p-value       |
| Clayton              | 0.6005                                                              | 0.258                    | 4.211                          | 0.04817                                                                                                          | 0.07842       |
| Gumbel               | 1.264                                                               | 0.135                    | 2.824                          | 0.028095                                                                                                         | 0.3262        |
| <b>Frank*</b>        | <b>2.754</b>                                                        | <b>0.985</b>             | <b>4.903</b>                   | <b>0.020058</b>                                                                                                  | <b>0.8616</b> |
| Joe                  | 1.278                                                               | 0.174                    | 1.475                          | 0.052335                                                                                                         | 0.03646       |
| BB1 (Clayton-Gumbel) | $\theta = \text{theta} = 0.5261$ ; $\delta = \text{delta} = 1.0435$ | NA                       | 4.244                          | 0.053884                                                                                                         | 0.2003        |
| BB6 (Joe-Gumbel)     | $\theta = \text{theta} = 1$ ; $\delta = \text{delta} = 1.264$       | NA                       | 2.824                          | 0.059203                                                                                                         | 0.2023        |
| BB7 (Joe-Clayton)    | $\theta = \text{theta} = 1.0000$ ; $\delta = \text{delta} = 0.6006$ | NA                       | 4.211                          | 0.060295                                                                                                         | 0.1643        |
| BB8 (Joe-Frank)      | $\theta = \text{theta} = 6$ ; $\delta = \text{delta} = 0.39$        | NA                       | 4.902                          | 0.031829                                                                                                         | 0.498         |

|                                                                                                                                                                                                                                                                                                                     |                                                                     |    |       |          |         |
|---------------------------------------------------------------------------------------------------------------------------------------------------------------------------------------------------------------------------------------------------------------------------------------------------------------------|---------------------------------------------------------------------|----|-------|----------|---------|
| Survival<br>clayton                                                                                                                                                                                                                                                                                                 | 0.3986                                                              | NA | 2.628 | 0.080974 | 0.07642 |
| Survival Joe                                                                                                                                                                                                                                                                                                        | 1.462                                                               | NA | 3.455 | 0.072261 | 0.09141 |
| Survival<br>Gumbel                                                                                                                                                                                                                                                                                                  | 1.336                                                               | NA | 4.312 | 0.047635 | 0.2692  |
| Survival<br>BB1                                                                                                                                                                                                                                                                                                     | $\theta = \text{theta} = 0.03614 ; \delta = \text{delta} = 1.31411$ | NA | 4.323 | 0.04636  | 0.2712  |
| Survival<br>BB6                                                                                                                                                                                                                                                                                                     | $\theta = \text{theta} = 1 ; \delta = \text{delta} = 1.336$         | NA | 4.312 | 0.047635 | 0.2702  |
| Survival<br>BB7                                                                                                                                                                                                                                                                                                     | $\theta = \text{theta} = 1.3412 ; \delta = \text{delta} = 0.2268$   | NA | 3.978 | 0.053815 | 0.2273  |
| Survival<br>BB8                                                                                                                                                                                                                                                                                                     | $\theta = \text{theta} = 6 ; \delta = \text{delta} = 0.4$           | NA | 4.918 | 0.032336 | 0.483   |
| <b>Note:</b> Frank copula (bold letter with asterisk) exhibited minimum value Cramer-Von Mises functional $S_n$ statistics with p-value is greater than 0.05, thus recognized as the most parsimonious bivariate copula in defining bivariate joint dependence structure in Tree 2 for D-vine structure-2 (case 2). |                                                                     |    |       |          |         |

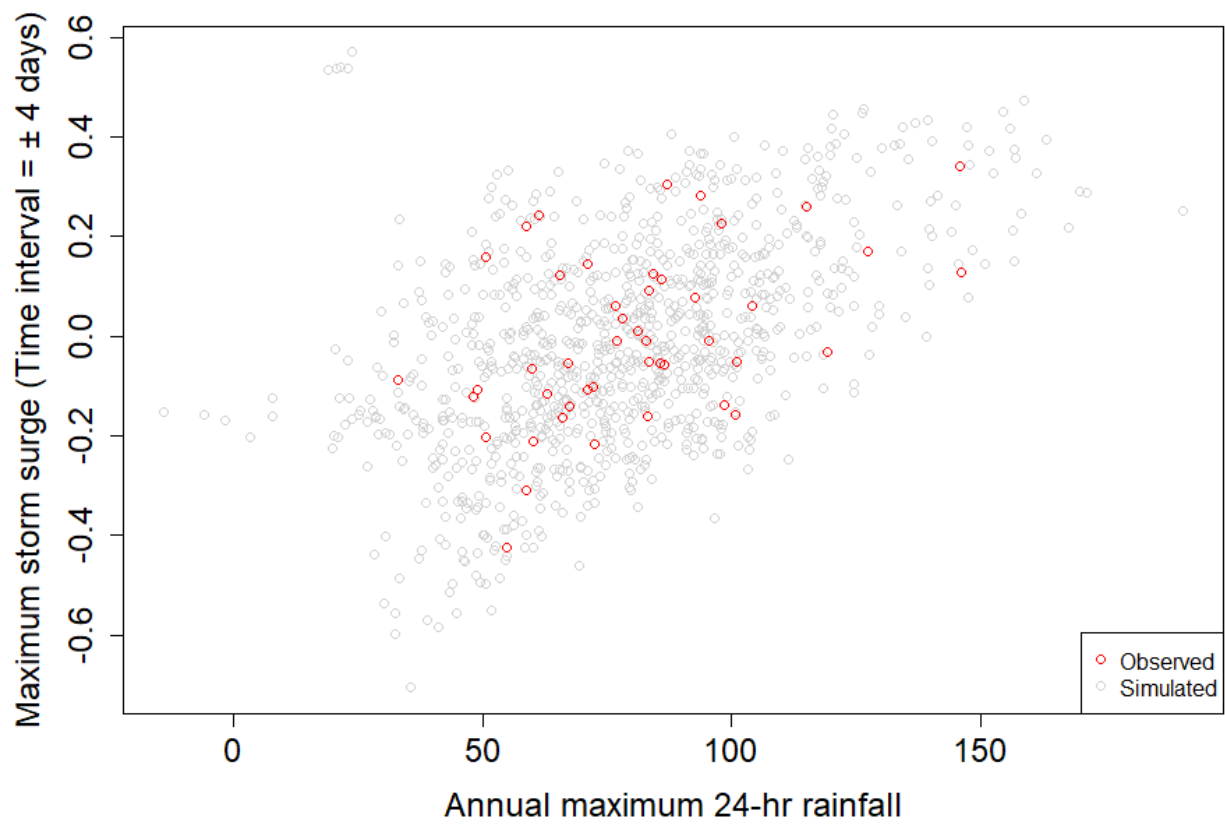

(a)

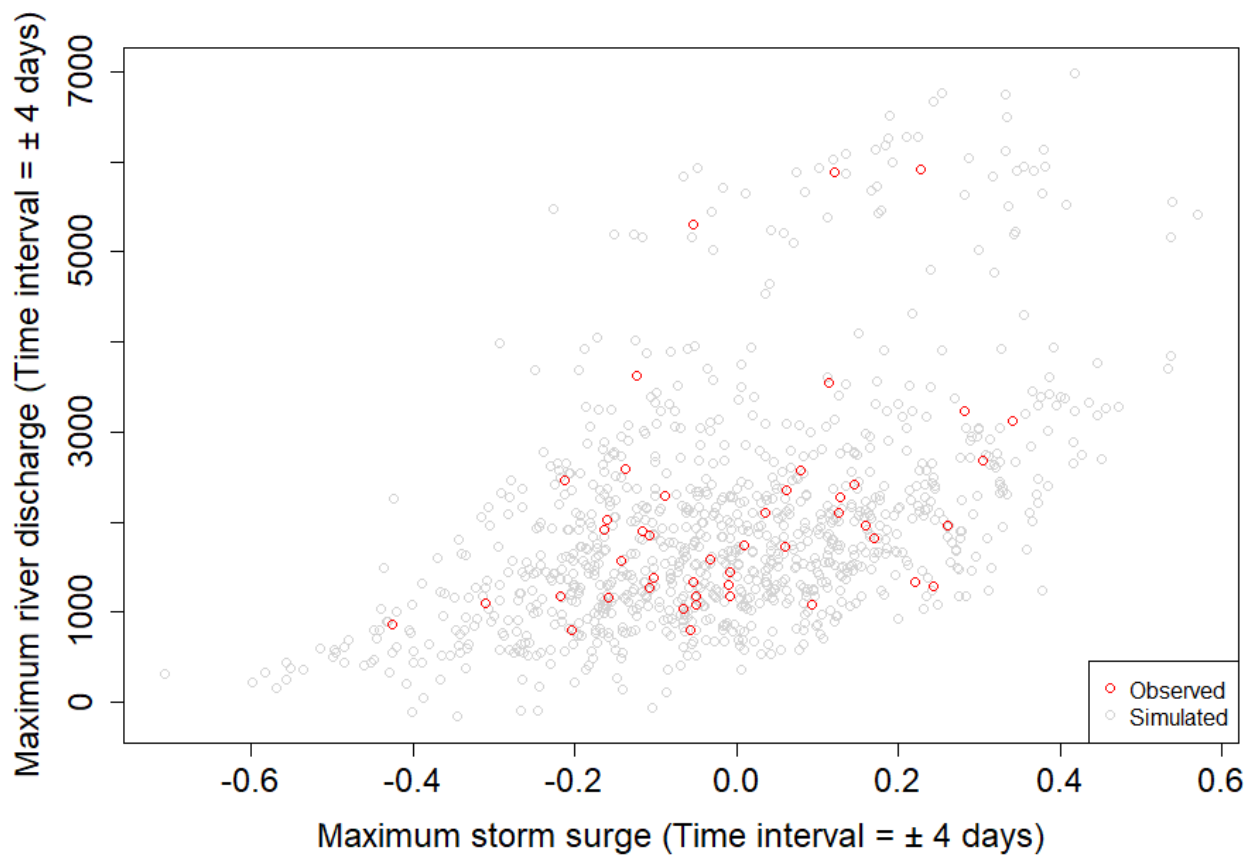

(b)

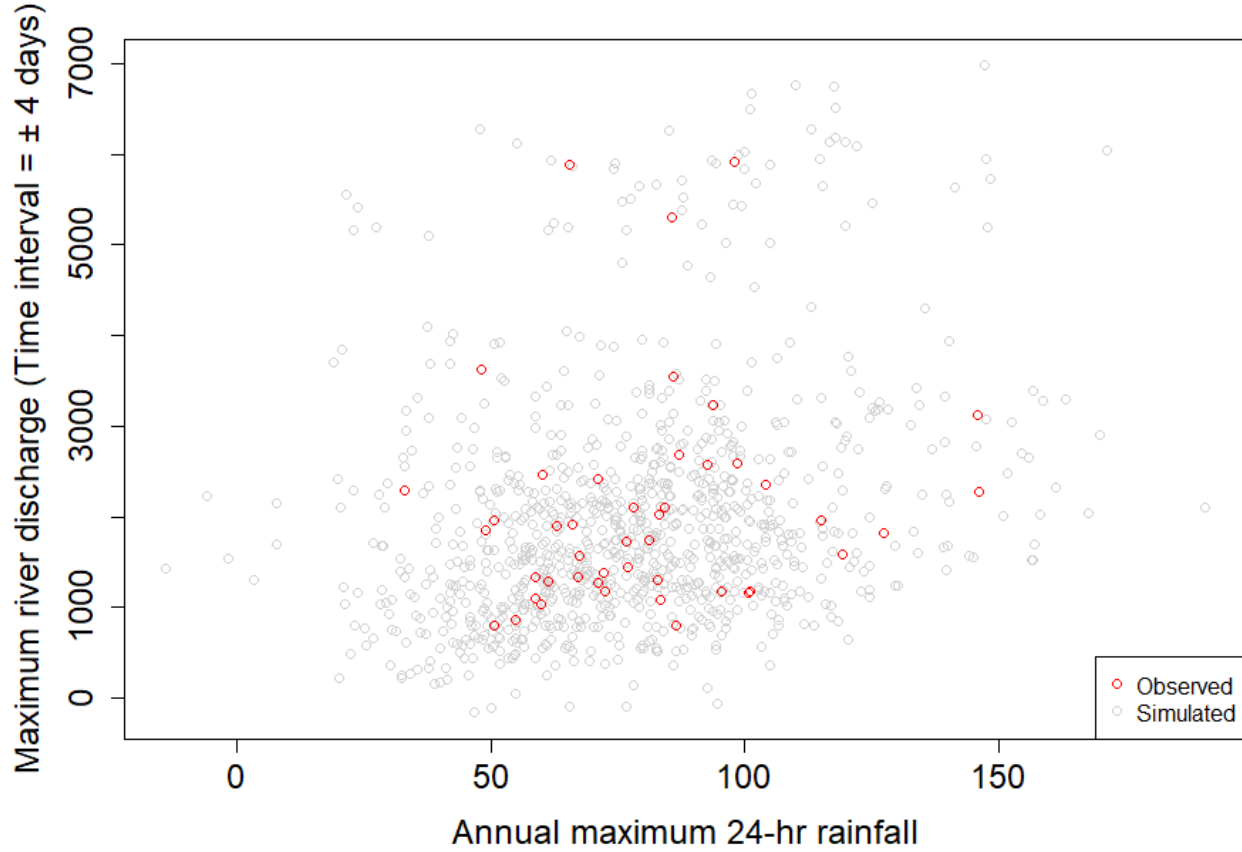

(c)

Figure S6: Overlapped 2-D scatterplot between simulated flood events (of sample size,  $N=1000$ , using D-vine structure in the nonparametric setting) and historical flood events for (a) rainfall and storm surge (b) storm surge and river discharge (c) rainfall and river discharge pair



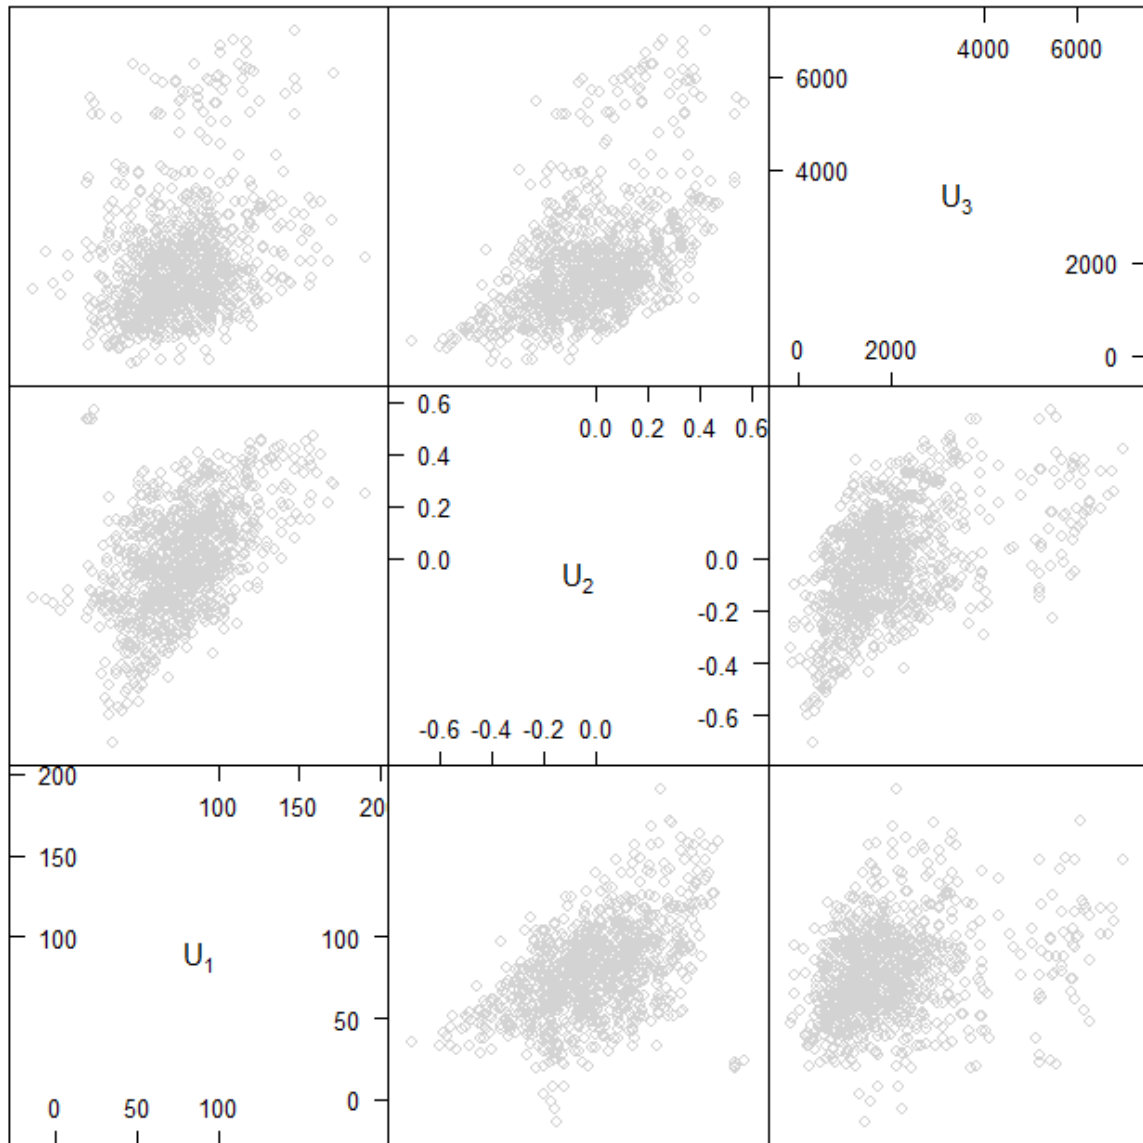

Figure S7: 3-D scatterplot of flood samples generated from best-fitted D-vine structure in the nonparametric settings

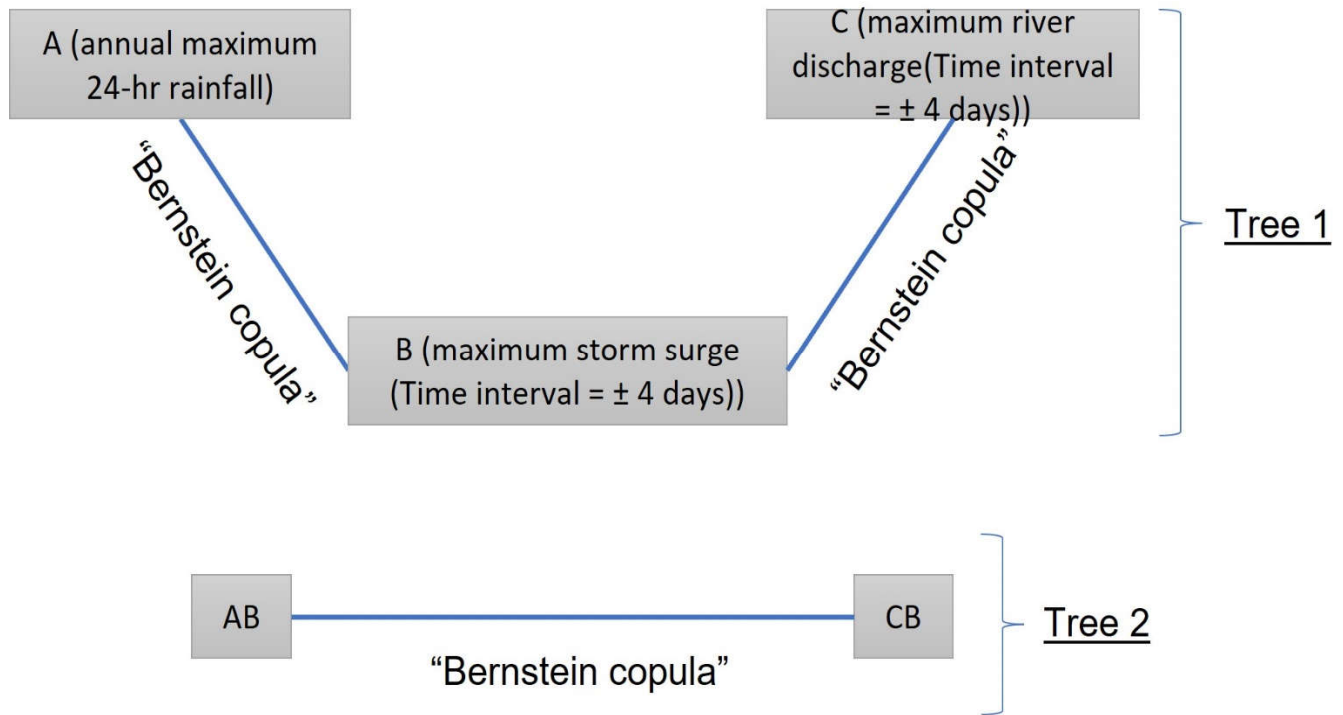

Figure S8: Vine tree plot of the fitted D-vine structure (case-2) in the nonparametric distribution setting
